# Supplementary material for: Using Publicly Available Tools to Assess Ecological Risks Associated with Agricultural Pesticide Use in California: The Case of Glyphosate
Source: Research Square preprint supplement (doi:10.21203/rs.3.rs-6228812/v1), 2025-05-05
Supplement: Supplementary file 1 [file 8c7ff7ce0c71fa64bb1a43e8.docx]

***Supplemental Materials***

**Using Publicly Available Tools to Assess Ecological Risks Associated with Agricultural Pesticide Use in California: The Case of Glyphosate**

Sashoy G. Milton1, Kaitlyn Yale2, Veneese J.B. Evans3,†, Lisa G.L. Yang4,†, Steven Bartell5, Loren D. Knopper6, and Andrey Massarsky7

*1Stantec, New York, NY 10017, USA*

*2Stantec, Washington, DC 20004, USA*

*3Stantec, Irvine, CA 92618, USA*

*4Stantec, San Francisco, CA 94104, USA*

*5Stantec, Greenback, TN 37742, USA*

*6Stantec, Stoney Creek, ON L8J 0B4, Canada*

*7Stantec, Irvine, CA 92618, USA*

*†Current affiliations: VJBE:* *California Department of Toxic Substances Control, Gardena, CA; LGLY: Takeda, San Francisco, CA.*

**Corresponding author:** Address: 38 Technology Drive, Suite 250, Irvine, CA 92618; Email: [andrey.massarsky@stantec.com](mailto:andrey.massarsky@stantec.com)

**Keywords:** Risk assessment; Glyphosate; Bees; Herpetofauna; Birds; Mammals

**Table S1** Glyphosate usage in California in 2022 (adopted from CDPR). Rows highlighted in orange represent entries that were removed during data processing

| **Chemical** | **Commodity or Site** | **Pounds Applied** | **Apps** | **Area Treated** | **Unit Treated** | **a.e. (ratio)** | **Pounds Applied (a.e.)** | **Area (A)** | **Application rate (Lbs/A)** |
| --- | --- | --- | --- | --- | --- | --- | --- | --- | --- |
| Glyphosate | Corn (forage - fodder) | 448.31 | 5 | 307 | A | 1 | 4.48E+02 | 307.0 | 2.92E-01 |
| Glyphosate, diammonium salt | Alfalfa | 19.59 | 1 | 14.5 | A | 0.83 | 1.63E+01 | 14.5 | 1.12E+00 |
| Glyphosate, diammonium salt | Almond | 5078.32 | 78 | 2282.72 | A | 0.83 | 4.22E+03 | 2,282.7 | 2.37E-02 |
| Glyphosate, diammonium salt | Corn (forage - fodder) | 1096.61 | 9 | 802.5 | A | 0.83 | 9.10E+02 | 802.5 | 1.26E-01 |
| Glyphosate, diammonium salt | Corn, human consumption | 308.09 | 1 | 76 | A | 0.83 | 2.56E+02 | 76.0 | 3.36E+00 |
| Glyphosate, diammonium salt | Cotton | 299.17 | 2 | 154 | A | 0.83 | 2.48E+02 | 154.0 | 8.06E-01 |
| Glyphosate, diammonium salt | Grape | 9.29 | 1 | 20 | A | 0.83 | 7.71E+00 | 20.0 | 3.86E-01 |
| Glyphosate, diammonium salt | Landscape maintenance | 6.93 | N/A | N/A | N/A | 0.83 | 5.75E+00 | Not possible | - |
| Glyphosate, diammonium salt | Lemon | 114.15 | 2 | 56.3 | A | 0.83 | 9.47E+01 | 56.3 | 8.41E-01 |
| Glyphosate, diammonium salt | N-grnhs transplants | 0.65 | 1 | 1 | A | 0.83 | 5.40E-01 | 1.0 | 5.40E-01 |
| Glyphosate, diammonium salt | Olive | 9.8 | 1 | 6.58 | A | 0.83 | 8.13E+00 | 6.6 | 1.24E+00 |
| Glyphosate, diammonium salt | Orange | 393.33 | 9 | 184.66 | A | 0.83 | 3.26E+02 | 184.7 | 1.96E-01 |
| Glyphosate, diammonium salt | Pistachio | 1888.85 | 19 | 846.69 | A | 0.83 | 1.57E+03 | 846.7 | 9.75E-02 |
| Glyphosate, diammonium salt | Prune | 259.96 | 7 | 110.93 | A | 0.83 | 2.16E+02 | 110.9 | 2.78E-01 |
| Glyphosate, diammonium salt | Rights of way | 54.05 | 2 | 40 | A | 0.83 | 4.49E+01 | 40.0 | 5.61E-01 |
| Glyphosate, diammonium salt | Rights of way | 257.08 | N/A | N/A | N/A | 0.83 | 2.13E+02 | Not possible | - |
| Glyphosate, diammonium salt | Tangerine | 81.08 | 3 | 40 | A | 0.83 | 6.73E+01 | 40.0 | 5.61E-01 |
| Glyphosate, diammonium salt | Uncultivated non-ag | 16.81 | N/A | 16 | A | 0.83 | 1.40E+01 | 16.0 | - |
| Glyphosate, diammonium salt | Walnut | 4599.71 | 93 | 2098.23 | A | 0.83 | 3.82E+03 | 2,098.2 | 1.96E-02 |
| Glyphosate, dimethylamine salt | Almond | 6575.24 | 26 | 3425 | A | 0.79 | 5.19E+03 | 3,425.0 | 5.83E-02 |
| Glyphosate, dimethylamine salt | Forest, timberland | 153459.35 | 2030 | 67309.91 | A | 0.79 | 1.21E+05 | 67,309.9 | 8.87E-04 |
| Glyphosate, dimethylamine salt | Forest, timberland | 550.31 | 1 | 200 | U | 0.79 | 4.35E+02 | Not possible | - |
| Glyphosate, dimethylamine salt | Landscape maintenance | 433.34 | N/A | N/A | N/A | 0.79 | 3.42E+02 | Not possible | - |
| Glyphosate, dimethylamine salt | Mint | 1.28 | 1 | 2 | A | 0.79 | 1.01E+00 | 2.0 | 5.06E-01 |
| Glyphosate, dimethylamine salt | N-outdr plants in containers | 2.87 | 6 | 12 | A | 0.79 | 2.27E+00 | 12.0 | 3.15E-02 |
| Glyphosate, dimethylamine salt | N-outdr transplants | 38.39 | 1 | 7.51 | A | 0.79 | 3.03E+01 | 7.5 | 4.04E+00 |
| Glyphosate, dimethylamine salt | Rangeland | 1.51 | 2 | 2 | A | 0.79 | 1.19E+00 | 2.0 | 2.98E-01 |
| Glyphosate, dimethylamine salt | Research commodity | 0.35 | N/A | N/A | N/A | 0.79 | 2.77E-01 | Not possible | - |
| Glyphosate, dimethylamine salt | Rights of way | 30429.01 | N/A | N/A | N/A | 0.79 | 2.40E+04 | Not possible | - |
| Glyphosate, dimethylamine salt | Structural pest control | 425.25 | N/A | N/A | N/A | 0.79 | 3.36E+02 | Not possible | - |
| Glyphosate, dimethylamine salt | Uncultivated ag | 8.28 | 3 | 7.75 | A | 0.79 | 6.54E+00 | 7.8 | 2.81E-01 |
| Glyphosate, dimethylamine salt | Uncultivated non-ag | 2.56 | 1 | 2 | A | 0.79 | 2.02E+00 | 2.0 | 1.01E+00 |
| Glyphosate, dimethylamine salt | Unknown | 12.29 | 1 | 3 | A | 0.79 | 9.71E+00 | 3.0 | 3.24E+00 |
| Glyphosate, isopropylamine salt | Airport | 325.49 | 3 | 94.6 | A | 0.74 | 2.41E+02 | 94.6 | 8.49E-01 |
| Glyphosate, isopropylamine salt | Alfalfa | 134285.29 | 2152 | 94329.55 | A | 0.74 | 9.94E+04 | 94,329.6 | 4.90E-04 |
| Glyphosate, isopropylamine salt | Almond | 1327394.72 | 17212 | 739840.22 | A | 0.74 | 9.82E+05 | 739,840.2 | 7.71E-05 |
| Glyphosate, isopropylamine salt | Almond | 0.39 | 4 | 16000 | S | 0.74 | 2.89E-01 | 3.673E-01 | 1.96E-01 |
| Glyphosate, isopropylamine salt | Apple | 1276.4 | 57 | 811.61 | A | 0.74 | 9.45E+02 | 811.6 | 2.04E-02 |
| Glyphosate, isopropylamine salt | Apple | 0.21 | 2 | 38 | U | 0.74 | 1.55E-01 | Not possible | - |
| Glyphosate, isopropylamine salt | Apricot | 2727.68 | 141 | 1820.63 | A | 0.74 | 2.02E+03 | 1,820.6 | 7.86E-03 |
| Glyphosate, isopropylamine salt | Apricot | 0.45 | 5 | 8600 | S | 0.74 | 3.33E-01 | 1.974E-01 | 3.37E-01 |
| Glyphosate, isopropylamine salt | Apricot | 0.26 | 2 | 43 | U | 0.74 | 1.92E-01 | Not possible | - |
| Glyphosate, isopropylamine salt | Artichoke, globe | 30.23 | 3 | 16 | A | 0.74 | 2.24E+01 | 16.0 | 4.66E-01 |
| Glyphosate, isopropylamine salt | Asparagus | 396.13 | 11 | 334.19 | A | 0.74 | 2.93E+02 | 334.2 | 7.97E-02 |
| Glyphosate, isopropylamine salt | Avocado | 32681.46 | 3267 | 25081.74 | A | 0.74 | 2.42E+04 | 25,081.7 | 2.95E-04 |
| Glyphosate, isopropylamine salt | Avocado | 396.07 | 28 | 1670500 | U | 0.74 | 2.93E+02 | Not possible | - |
| Glyphosate, isopropylamine salt | Barley | 1270.37 | 3 | 344 | A | 0.74 | 9.40E+02 | 344.0 | 9.11E-01 |
| Glyphosate, isopropylamine salt | Barley (forage - fodder) | 1057.6 | 26 | 413.5 | A | 0.74 | 7.83E+02 | 413.5 | 7.28E-02 |
| Glyphosate, isopropylamine salt | Basil, sweet | 207.2 | 4 | 186.5 | A | 0.74 | 1.53E+02 | 186.5 | 2.06E-01 |
| Glyphosate, isopropylamine salt | Bean, dried | 3142.97 | 21 | 1678.32 | A | 0.74 | 2.33E+03 | 1,678.3 | 6.60E-02 |
| Glyphosate, isopropylamine salt | Bean, succulent | 513.96 | 10 | 286.78 | A | 0.74 | 3.80E+02 | 286.8 | 1.33E-01 |
| Glyphosate, isopropylamine salt | Bean, unspecified | 68.01 | 1 | 68 | A | 0.74 | 5.03E+01 | 68.0 | 7.40E-01 |
| Glyphosate, isopropylamine salt | Bermudagrass | 809.75 | 6 | 288.9 | A | 0.74 | 5.99E+02 | 288.9 | 3.46E-01 |
| Glyphosate, isopropylamine salt | Bitter melon | 2.16 | 2 | 3 | A | 0.74 | 1.60E+00 | 3.0 | 2.66E-01 |
| Glyphosate, isopropylamine salt | Blackberry | 33.46 | 4 | 19.82 | A | 0.74 | 2.48E+01 | 19.8 | 3.12E-01 |
| Glyphosate, isopropylamine salt | Blueberry | 4195.39 | 96 | 2393.03 | A | 0.74 | 3.10E+03 | 2,393.0 | 1.35E-02 |
| Glyphosate, isopropylamine salt | Bok choy (choy sum, pak choi) | 15.23 | 1 | 4.75 | A | 0.74 | 1.13E+01 | 4.8 | 2.37E+00 |
| Glyphosate, isopropylamine salt | Broccoli | 310.64 | 15 | 156.15 | A | 0.74 | 2.30E+02 | 156.2 | 9.81E-02 |
| Glyphosate, isopropylamine salt | Brussels sprout | 17.26 | 4 | 34.9 | A | 0.74 | 1.28E+01 | 34.9 | 9.15E-02 |
| Glyphosate, isopropylamine salt | Buildings/non-ag outdoor | 8.04 | N/A | 1.1 | A | 0.74 | 5.95E+00 | 1.1 | - |
| Glyphosate, isopropylamine salt | Cabbage | 695.76 | 24 | 444.89 | A | 0.74 | 5.15E+02 | 444.9 | 4.82E-02 |
| Glyphosate, isopropylamine salt | Cantaloupe | 5625.22 | 21 | 2072.5 | A | 0.74 | 4.16E+03 | 2,072.5 | 9.56E-02 |
| Glyphosate, isopropylamine salt | Carrot | 102.02 | 1 | 68 | A | 0.74 | 7.55E+01 | 68.0 | 1.11E+00 |
| Glyphosate, isopropylamine salt | Cauliflower | 113.24 | 8 | 79.3 | A | 0.74 | 8.38E+01 | 79.3 | 1.32E-01 |
| Glyphosate, isopropylamine salt | Celery | 2553.07 | 47 | 945.39 | A | 0.74 | 1.89E+03 | 945.4 | 4.25E-02 |
| Glyphosate, isopropylamine salt | Cherimoya | 35.97 | 5 | 22.25 | A | 0.74 | 2.66E+01 | 22.3 | 2.39E-01 |
| Glyphosate, isopropylamine salt | Cherry | 17323.04 | 653 | 9612.23 | A | 0.74 | 1.28E+04 | 9,612.2 | 2.04E-03 |
| Glyphosate, isopropylamine salt | Cherry | 0.8 | 5 | 23800 | S | 0.74 | 5.92E-01 | 5.464E-01 | 2.17E-01 |
| Glyphosate, isopropylamine salt | Cherry | <0.01 | 1 | 2 | U | 0.74 | #VALUE! | Not possible | - |
| Glyphosate, isopropylamine salt | Chestnut | 47.65 | 5 | 24.44 | A | 0.74 | 3.53E+01 | 24.4 | 2.89E-01 |
| Glyphosate, isopropylamine salt | Chinese cabbage (napa, wong bok, celery cabbage) | 22.92 | 1 | 7.15 | A | 0.74 | 1.70E+01 | 7.2 | 2.37E+00 |
| Glyphosate, isopropylamine salt | Christmas tree | 204.98 | 27 | 154 | A | 0.74 | 1.52E+02 | 154.0 | 3.65E-02 |
| Glyphosate, isopropylamine salt | Cilantro | 335.71 | 5 | 58 | A | 0.74 | 2.48E+02 | 58.0 | 8.57E-01 |
| Glyphosate, isopropylamine salt | Citrus | 965.85 | 141 | 1993.88 | A | 0.74 | 7.15E+02 | 1,993.9 | 2.54E-03 |
| Glyphosate, isopropylamine salt | Citrus | 28 | 2 | 50000 | U | 0.74 | 2.07E+01 | Not possible | - |
| Glyphosate, isopropylamine salt | Clover | 209.82 | 2 | 140 | A | 0.74 | 1.55E+02 | 140.0 | 5.55E-01 |
| Glyphosate, isopropylamine salt | Commercial, institutional or industrial areas | 102.94 | 2 | 648.23 | A | 0.74 | 7.62E+01 | 648.2 | 5.88E-02 |
| Glyphosate, isopropylamine salt | Commercial, institutional or industrial areas | 63.49 | N/A | 30028.88 | K | 0.74 | 4.70E+01 | Not possible | - |
| Glyphosate, isopropylamine salt | Commercial, institutional or industrial areas | 12.71 | N/A | 1981972 | S | 0.74 | 9.41E+00 | 4.550E+01 | - |
| Glyphosate, isopropylamine salt | Commodity fumigation | 1.21 | 1 | 1 | A | 0.74 | 8.95E-01 | 1.0 | 8.95E-01 |
| Glyphosate, isopropylamine salt | Commodity fumigation | 9.97 | N/A | N/A | N/A | 0.74 | 7.38E+00 | Not possible | - |
| Glyphosate, isopropylamine salt | Corn (forage - fodder) | 179100.06 | 2505 | 128023.52 | A | 0.74 | 1.33E+05 | 128,023.5 | 4.13E-04 |
| Glyphosate, isopropylamine salt | Corn, grain | 6210.47 | 95 | 4434.02 | A | 0.74 | 4.60E+03 | 4,434.0 | 1.09E-02 |
| Glyphosate, isopropylamine salt | Corn, human consumption | 3832.28 | 55 | 2330.4 | A | 0.74 | 2.84E+03 | 2,330.4 | 2.21E-02 |
| Glyphosate, isopropylamine salt | Cotton | 114604.34 | 1003 | 66445.34 | A | 0.74 | 8.48E+04 | 66,445.3 | 1.27E-03 |
| Glyphosate, isopropylamine salt | Cucumber | 567.16 | 8 | 240.75 | A | 0.74 | 4.20E+02 | 240.8 | 2.18E-01 |
| Glyphosate, isopropylamine salt | Date | 5537.16 | 211 | 3259.17 | A | 0.74 | 4.10E+03 | 3,259.2 | 5.96E-03 |
| Glyphosate, isopropylamine salt | Ditch bank | 5000.27 | 201 | 1916.57 | A | 0.74 | 3.70E+03 | 1,916.6 | 9.61E-03 |
| Glyphosate, isopropylamine salt | Ditch bank | 13.42 | N/A | 7200 | S | 0.74 | 9.93E+00 | 1.653E-01 | - |
| Glyphosate, isopropylamine salt | Ditch bank | 20.9 | N/A | 20 | U | 0.74 | 1.55E+01 | Not possible | - |
| Glyphosate, isopropylamine salt | Eggplant | 32.33 | 5 | 18 | A | 0.74 | 2.39E+01 | 18.0 | 2.66E-01 |
| Glyphosate, isopropylamine salt | Farm/ag building | 8.1 | 6 | 4.5 | A | 0.74 | 5.99E+00 | 4.5 | 2.22E-01 |
| Glyphosate, isopropylamine salt | Fennel | 24.74 | 1 | 12 | A | 0.74 | 1.83E+01 | 12.0 | 1.53E+00 |
| Glyphosate, isopropylamine salt | Fig | 4521.19 | 127 | 2569.42 | A | 0.74 | 3.35E+03 | 2,569.4 | 1.03E-02 |
| Glyphosate, isopropylamine salt | Fig | <0.01 | 1 | 2 | U | 0.74 | #VALUE! | Not possible | - |
| Glyphosate, isopropylamine salt | Forage hay/silage | 1344.8 | 18 | 857.3 | A | 0.74 | 9.95E+02 | 857.3 | 6.45E-02 |
| Glyphosate, isopropylamine salt | Forest, timberland | 63530.08 | 736 | 19055.45 | A | 0.74 | 4.70E+04 | 19,055.5 | 3.35E-03 |
| Glyphosate, isopropylamine salt | Forest, timberland | 4.07 | N/A | 208 | U | 0.74 | 3.01E+00 | Not possible | - |
| Glyphosate, isopropylamine salt | Garbanzo bean | 974.79 | 2 | 329 | A | 0.74 | 7.21E+02 | 329.0 | 1.10E+00 |
| Glyphosate, isopropylamine salt | Garlic | 9914.07 | 42 | 4360.11 | A | 0.74 | 7.34E+03 | 4,360.1 | 4.01E-02 |
| Glyphosate, isopropylamine salt | Golf course turf | 342.67 | 2 | 373.75 | A | 0.74 | 2.54E+02 | 373.8 | 3.39E-01 |
| Glyphosate, isopropylamine salt | Golf course turf | 25.93 | N/A | 173000 | S | 0.74 | 1.92E+01 | 3.972E+00 | - |
| Glyphosate, isopropylamine salt | Golf course turf | 10.99 | N/A | 129 | U | 0.74 | 8.13E+00 | Not possible | - |
| Glyphosate, isopropylamine salt | Grain | 17.98 | 2 | 18 | A | 0.74 | 1.33E+01 | 18.0 | 3.70E-01 |
| Glyphosate, isopropylamine salt | Grape | 74837.53 | 2112 | 48908.04 | A | 0.74 | 5.54E+04 | 48,908.0 | 5.36E-04 |
| Glyphosate, isopropylamine salt | Grape | 0.43 | 1 | 1400 | S | 0.74 | 3.18E-01 | 3.214E-02 | 9.90E+00 |
| Glyphosate, isopropylamine salt | Grape | 0.12 | 1 | 50 | U | 0.74 | 8.88E-02 | Not possible | - |
| Glyphosate, isopropylamine salt | Grape, wine | 221315.08 | 6391 | 125655.5 | A | 0.74 | 1.64E+05 | 125,655.5 | 2.04E-04 |
| Glyphosate, isopropylamine salt | Grape, wine | 2.25 | 1 | 53100 | S | 0.74 | 1.67E+00 | 1.219E+00 | 1.37E+00 |
| Glyphosate, isopropylamine salt | Grapefruit | 3695.52 | 242 | 2745.85 | A | 0.74 | 2.73E+03 | 2,745.9 | 4.12E-03 |
| Glyphosate, isopropylamine salt | Grapefruit | 0.4 | 1 | 200 | S | 0.74 | 2.96E-01 | 4.591E-03 | 6.45E+01 |
| Glyphosate, isopropylamine salt | Grass, seed | 603.29 | 21 | 324.6 | A | 0.74 | 4.46E+02 | 324.6 | 6.55E-02 |
| Glyphosate, isopropylamine salt | Herb, spice | 180.03 | 3 | 108 | A | 0.74 | 1.33E+02 | 108.0 | 4.11E-01 |
| Glyphosate, isopropylamine salt | Hops | 10.01 | 2 | 10 | A | 0.74 | 7.41E+00 | 10.0 | 3.70E-01 |
| Glyphosate, isopropylamine salt | Industrial waste disposal systems, disposal water | 2.08 | 1 | 5 | A | 0.74 | 1.54E+00 | 5.0 | 3.08E-01 |
| Glyphosate, isopropylamine salt | Jicama | 20.16 | 2 | 32 | A | 0.74 | 1.49E+01 | 32.0 | 2.33E-01 |
| Glyphosate, isopropylamine salt | Kiwi fruit fuzzy | 4891.32 | 163 | 2201.85 | A | 0.74 | 3.62E+03 | 2,201.9 | 1.01E-02 |
| Glyphosate, isopropylamine salt | Landscape maintenance | 1515.15 | 123 | 1264.95 | A | 0.74 | 1.12E+03 | 1,265.0 | 7.21E-03 |
| Glyphosate, isopropylamine salt | Landscape maintenance | 2.12 | 4 | 2700 | S | 0.74 | 1.57E+00 | 6.198E-02 | 6.33E+00 |
| Glyphosate, isopropylamine salt | Landscape maintenance | 115.49 | 1 | 0.01 | U | 0.74 | 8.55E+01 | Not possible | - |
| Glyphosate, isopropylamine salt | Landscape maintenance | 267709.21 | N/A | N/A | N/A | 0.74 | 1.98E+05 | Not possible | - |
| Glyphosate, isopropylamine salt | Lemon | 48215.42 | 2818 | 35386.86 | A | 0.74 | 3.57E+04 | 35,386.9 | 3.58E-04 |
| Glyphosate, isopropylamine salt | Lettuce, head | 13.92 | 2 | 4 | A | 0.74 | 1.03E+01 | 4.0 | 1.29E+00 |
| Glyphosate, isopropylamine salt | Lettuce, leaf | 236.05 | 11 | 107.25 | A | 0.74 | 1.75E+02 | 107.3 | 1.48E-01 |
| Glyphosate, isopropylamine salt | Lime | 136.55 | 26 | 137.48 | A | 0.74 | 1.01E+02 | 137.5 | 2.83E-02 |
| Glyphosate, isopropylamine salt | Mango | 19.98 | 1 | 2.5 | A | 0.74 | 1.48E+01 | 2.5 | 5.91E+00 |
| Glyphosate, isopropylamine salt | Melon | 4599.89 | 28 | 1291.55 | A | 0.74 | 3.40E+03 | 1,291.6 | 9.41E-02 |
| Glyphosate, isopropylamine salt | Mustard greens | 208.14 | 2 | 51 | A | 0.74 | 1.54E+02 | 51.0 | 1.51E+00 |
| Glyphosate, isopropylamine salt | N-grnhs flower | 198.75 | 46 | 317.87 | A | 0.74 | 1.47E+02 | 317.9 | 1.01E-02 |
| Glyphosate, isopropylamine salt | N-grnhs flower | 28.71 | 3 | 257775 | S | 0.74 | 2.12E+01 | 5.918E+00 | 1.20E+00 |
| Glyphosate, isopropylamine salt | N-grnhs plants in containers | 627.21 | 204 | 200.56 | A | 0.74 | 4.64E+02 | 200.6 | 1.13E-02 |
| Glyphosate, isopropylamine salt | N-grnhs plants in containers | 75.94 | 72 | 2404144 | S | 0.74 | 5.62E+01 | 5.519E+01 | 1.41E-02 |
| Glyphosate, isopropylamine salt | N-grnhs transplants | 181.92 | 37 | 493.46 | A | 0.74 | 1.35E+02 | 493.5 | 7.37E-03 |
| Glyphosate, isopropylamine salt | N-grnhs transplants | 5.91 | 6 | 121500 | S | 0.74 | 4.37E+00 | 2.789E+00 | 2.61E-01 |
| Glyphosate, isopropylamine salt | N-outdr flower | 4878.79 | 550 | 1413.9 | A | 0.74 | 3.61E+03 | 1,413.9 | 4.64E-03 |
| Glyphosate, isopropylamine salt | N-outdr plants in containers | 58335.58 | 7284 | 14809.39 | A | 0.74 | 4.32E+04 | 14,809.4 | 4.00E-04 |
| Glyphosate, isopropylamine salt | N-outdr plants in containers | 5.99 | 1 | 1 | C | 0.74 | 4.43E+00 | Not possible | - |
| Glyphosate, isopropylamine salt | N-outdr plants in containers | 300.72 | 281 | 3222898.88 | S | 0.74 | 2.23E+02 | 7.399E+01 | 1.07E-02 |
| Glyphosate, isopropylamine salt | N-outdr plants in containers | 738.27 | 47 | 393862.25 | U | 0.74 | 5.46E+02 | Not possible | - |
| Glyphosate, isopropylamine salt | N-outdr transplants | 1074.46 | 188 | 606.62 | A | 0.74 | 7.95E+02 | 606.6 | 6.97E-03 |
| Glyphosate, isopropylamine salt | N-outdr transplants | 1.86 | 9 | 19100 | S | 0.74 | 1.38E+00 | 4.385E-01 | 3.49E-01 |
| Glyphosate, isopropylamine salt | Nectarine | 12435.3 | 631 | 7905.35 | A | 0.74 | 9.20E+03 | 7,905.4 | 1.84E-03 |
| Glyphosate, isopropylamine salt | Nectarine | 0.82 | 5 | 24800 | S | 0.74 | 6.07E-01 | 5.693E-01 | 2.13E-01 |
| Glyphosate, isopropylamine salt | Nectarine | <0.01 | 1 | 3 | U | 0.74 | #VALUE! | Not possible | - |
| Glyphosate, isopropylamine salt | Nursery soil | 116.02 | 7 | 12 | A | 0.74 | 8.59E+01 | 12.0 | 1.02E+00 |
| Glyphosate, isopropylamine salt | Oat | 18.45 | 2 | 22 | A | 0.74 | 1.37E+01 | 22.0 | 3.10E-01 |
| Glyphosate, isopropylamine salt | Oat (forage - fodder) | 672.76 | 20 | 534 | A | 0.74 | 4.98E+02 | 534.0 | 4.66E-02 |
| Glyphosate, isopropylamine salt | Olive | 20924.06 | 476 | 13128.35 | A | 0.74 | 1.55E+04 | 13,128.4 | 2.48E-03 |
| Glyphosate, isopropylamine salt | Onion, dry | 4148.42 | 45 | 2069.37 | A | 0.74 | 3.07E+03 | 2,069.4 | 3.30E-02 |
| Glyphosate, isopropylamine salt | Onion, green | 54.71 | 1 | 54.2 | A | 0.74 | 4.05E+01 | 54.2 | 7.47E-01 |
| Glyphosate, isopropylamine salt | Orange | 48685.16 | 2161 | 39787.31 | A | 0.74 | 3.60E+04 | 39,787.3 | 4.19E-04 |
| Glyphosate, isopropylamine salt | Orchard floor | 0.52 | 3 | 15 | A | 0.74 | 3.85E-01 | 15.0 | 8.55E-03 |
| Glyphosate, isopropylamine salt | Orchardgrass | 181.27 | 1 | 145 | A | 0.74 | 1.34E+02 | 145.0 | 9.25E-01 |
| Glyphosate, isopropylamine salt | Parsley | 35.97 | 4 | 24 | A | 0.74 | 2.66E+01 | 24.0 | 2.77E-01 |
| Glyphosate, isopropylamine salt | Pastureland | 2853.63 | 124 | 2014.31 | A | 0.74 | 2.11E+03 | 2,014.3 | 8.45E-03 |
| Glyphosate, isopropylamine salt | Pastureland | 6.07 | 5 | 33060 | S | 0.74 | 4.49E+00 | 7.590E-01 | 1.18E+00 |
| Glyphosate, isopropylamine salt | Peach | 29420.76 | 1387 | 17240.47 | A | 0.74 | 2.18E+04 | 17,240.5 | 9.10E-04 |
| Glyphosate, isopropylamine salt | Peach | 0.7 | 4 | 18800 | S | 0.74 | 5.18E-01 | 4.316E-01 | 3.00E-01 |
| Glyphosate, isopropylamine salt | Peach | 0.4 | 2 | 69 | U | 0.74 | 2.96E-01 | Not possible | - |
| Glyphosate, isopropylamine salt | Pear | 2979.77 | 97 | 1880.38 | A | 0.74 | 2.21E+03 | 1,880.4 | 1.21E-02 |
| Glyphosate, isopropylamine salt | Pear | 0.01 | 1 | 4 | U | 0.74 | 7.40E-03 | Not possible | - |
| Glyphosate, isopropylamine salt | Pear, asian (oriental pear, ya, ya li, nashi) | 51.87 | 12 | 58.5 | A | 0.74 | 3.84E+01 | 58.5 | 5.47E-02 |
| Glyphosate, isopropylamine salt | Pecan | 5068.05 | 91 | 2670.56 | A | 0.74 | 3.75E+03 | 2,670.6 | 1.54E-02 |
| Glyphosate, isopropylamine salt | Pepper, fruiting | 3208.95 | 47 | 1576.25 | A | 0.74 | 2.37E+03 | 1,576.3 | 3.21E-02 |
| Glyphosate, isopropylamine salt | Peppermint | 1 | 1 | 1 | A | 0.74 | 7.40E-01 | 1.0 | 7.40E-01 |
| Glyphosate, isopropylamine salt | Persimmon | 717.97 | 92 | 692.78 | A | 0.74 | 5.31E+02 | 692.8 | 8.34E-03 |
| Glyphosate, isopropylamine salt | Persimmon | <0.01 | 1 | 1 | U | 0.74 | #VALUE! | Not possible | - |
| Glyphosate, isopropylamine salt | Pistachio | 398504.03 | 4493 | 219104.56 | A | 0.74 | 2.95E+05 | 219,104.6 | 3.00E-04 |
| Glyphosate, isopropylamine salt | Pistachio | 6.96 | 7 | 39844 | S | 0.74 | 5.15E+00 | 9.147E-01 | 8.04E-01 |
| Glyphosate, isopropylamine salt | Pistachio | 15.89 | 11 | 130 | U | 0.74 | 1.18E+01 | Not possible | - |
| Glyphosate, isopropylamine salt | Plum | 11411.13 | 883 | 7041.79 | A | 0.74 | 8.44E+03 | 7,041.8 | 1.36E-03 |
| Glyphosate, isopropylamine salt | Plum | 0.3 | 2 | 4800 | S | 0.74 | 2.22E-01 | 1.102E-01 | 1.01E+00 |
| Glyphosate, isopropylamine salt | Plum | <0.01 | 1 | 2 | U | 0.74 | #VALUE! | Not possible | - |
| Glyphosate, isopropylamine salt | Pluot | 6.13 | 3 | 5.8 | A | 0.74 | 4.54E+00 | 5.8 | 2.61E-01 |
| Glyphosate, isopropylamine salt | Pluot | 0.26 | 2 | 8000 | S | 0.74 | 1.92E-01 | 1.837E-01 | 5.24E-01 |
| Glyphosate, isopropylamine salt | Pomegranate | 9753.62 | 130 | 5231.45 | A | 0.74 | 7.22E+03 | 5,231.5 | 1.06E-02 |
| Glyphosate, isopropylamine salt | Pomelo | 542.25 | 38 | 325.61 | A | 0.74 | 4.01E+02 | 325.6 | 3.24E-02 |
| Glyphosate, isopropylamine salt | Potato | 2363.25 | 81 | 1766.26 | A | 0.74 | 1.75E+03 | 1,766.3 | 1.22E-02 |
| Glyphosate, isopropylamine salt | Prune | 20431.94 | 508 | 12185.91 | A | 0.74 | 1.51E+04 | 12,185.9 | 2.44E-03 |
| Glyphosate, isopropylamine salt | Public health | 4914.88 | N/A | N/A | N/A | 0.74 | 3.64E+03 | Not possible | - |
| Glyphosate, isopropylamine salt | Pumpkin | 4663.01 | 35 | 1252.65 | A | 0.74 | 3.45E+03 | 1,252.7 | 7.87E-02 |
| Glyphosate, isopropylamine salt | Quince | 15.06 | 4 | 16 | A | 0.74 | 1.11E+01 | 16.0 | 1.74E-01 |
| Glyphosate, isopropylamine salt | Rangeland | 890.48 | 158 | 6379.31 | A | 0.74 | 6.59E+02 | 6,379.3 | 6.54E-04 |
| Glyphosate, isopropylamine salt | Raspberry | 139.22 | 1 | 34 | A | 0.74 | 1.03E+02 | 34.0 | 3.03E+00 |
| Glyphosate, isopropylamine salt | Recreation area | 37.08 | 2 | 22.46 | A | 0.74 | 2.74E+01 | 22.5 | 6.11E-01 |
| Glyphosate, isopropylamine salt | Regulatory pest control | 9.99 | 1 | 10 | A | 0.74 | 7.39E+00 | 10.0 | 7.39E-01 |
| Glyphosate, isopropylamine salt | Regulatory pest control | 1689.72 | N/A | N/A | N/A | 0.74 | 1.25E+03 | Not possible | - |
| Glyphosate, isopropylamine salt | Research commodity | 237.93 | 18 | 64.18 | A | 0.74 | 1.76E+02 | 64.2 | 1.52E-01 |
| Glyphosate, isopropylamine salt | Research commodity | 7.47 | 2 | 31500 | S | 0.74 | 5.53E+00 | 7.231E-01 | 3.82E+00 |
| Glyphosate, isopropylamine salt | Research commodity | 281.06 | N/A | N/A | N/A | 0.74 | 2.08E+02 | Not possible | - |
| Glyphosate, isopropylamine salt | Rice | 6966.42 | 100 | 6232 | A | 0.74 | 5.16E+03 | 6,232.0 | 8.27E-03 |
| Glyphosate, isopropylamine salt | Rights of way | 80298.66 | 851 | 46142.6 | A | 0.74 | 5.94E+04 | 46,142.6 | 1.51E-03 |
| Glyphosate, isopropylamine salt | Rights of way | 4.69 | 8 | 59900 | S | 0.74 | 3.47E+00 | 1.375E+00 | 3.15E-01 |
| Glyphosate, isopropylamine salt | Rights of way | 710.4 | 33 | 114.03 | U | 0.74 | 5.26E+02 | Not possible | - |
| Glyphosate, isopropylamine salt | Rights of way | 1076811.92 | N/A | N/A | N/A | 0.74 | 7.97E+05 | Not possible | - |
| Glyphosate, isopropylamine salt | Ryegrass | 392.31 | 11 | 453 | A | 0.74 | 2.90E+02 | 453.0 | 5.83E-02 |
| Glyphosate, isopropylamine salt | Safflower | 1384.87 | 30 | 2647.3 | A | 0.74 | 1.02E+03 | 2,647.3 | 1.29E-02 |
| Glyphosate, isopropylamine salt | Sod farm (turf) | 547.35 | 14 | 104 | A | 0.74 | 4.05E+02 | 104.0 | 2.78E-01 |
| Glyphosate, isopropylamine salt | Soil fumigation/preplant | 26685.88 | 156 | 19929.38 | A | 0.74 | 1.97E+04 | 19,929.4 | 6.35E-03 |
| Glyphosate, isopropylamine salt | Sorghum (forage - fodder) | 134.98 | 2 | 130 | A | 0.74 | 9.99E+01 | 130.0 | 3.84E-01 |
| Glyphosate, isopropylamine salt | Sorghum/milo | 93.68 | 1 | 75 | A | 0.74 | 6.93E+01 | 75.0 | 9.24E-01 |
| Glyphosate, isopropylamine salt | Soybean | 230.04 | 1 | 140 | A | 0.74 | 1.70E+02 | 140.0 | 1.22E+00 |
| Glyphosate, isopropylamine salt | Squash | 1.38 | 1 | 0.6 | A | 0.74 | 1.02E+00 | 0.6 | 1.70E+00 |
| Glyphosate, isopropylamine salt | Squash, winter | 23.12 | 1 | 15.4 | A | 0.74 | 1.71E+01 | 15.4 | 1.11E+00 |
| Glyphosate, isopropylamine salt | Stone fruit | 10.5 | 7 | 4.93 | A | 0.74 | 7.77E+00 | 4.9 | 2.25E-01 |
| Glyphosate, isopropylamine salt | Strawberry | 1488.96 | 18 | 275.4 | A | 0.74 | 1.10E+03 | 275.4 | 2.22E-01 |
| Glyphosate, isopropylamine salt | Structural pest control | 898.64 | N/A | N/A | N/A | 0.74 | 6.65E+02 | Not possible | - |
| Glyphosate, isopropylamine salt | Sudangrass | 451.12 | 5 | 356 | A | 0.74 | 3.34E+02 | 356.0 | 1.88E-01 |
| Glyphosate, isopropylamine salt | Sugarbeet | 17460.55 | 203 | 14296.9 | A | 0.74 | 1.29E+04 | 14,296.9 | 4.45E-03 |
| Glyphosate, isopropylamine salt | Sunflower | 2523.82 | 23 | 1442.14 | A | 0.74 | 1.87E+03 | 1,442.1 | 5.63E-02 |
| Glyphosate, isopropylamine salt | Sweet potato | 22.55 | 1 | 15 | A | 0.74 | 1.67E+01 | 15.0 | 1.11E+00 |
| Glyphosate, isopropylamine salt | Tangelo | 580.69 | 38 | 444.64 | A | 0.74 | 4.30E+02 | 444.6 | 2.54E-02 |
| Glyphosate, isopropylamine salt | Tangerine | 38739.33 | 1144 | 20202.28 | A | 0.74 | 2.87E+04 | 20,202.3 | 1.24E-03 |
| Glyphosate, isopropylamine salt | Thyme | 0.38 | 1 | 0.63 | A | 0.74 | 2.81E-01 | 0.6 | 4.46E-01 |
| Glyphosate, isopropylamine salt | Tomato | 7483.22 | 84 | 4230.58 | A | 0.74 | 5.54E+03 | 4,230.6 | 1.56E-02 |
| Glyphosate, isopropylamine salt | Tomato, processing | 58721.82 | 402 | 32176.4 | A | 0.74 | 4.35E+04 | 32,176.4 | 3.36E-03 |
| Glyphosate, isopropylamine salt | Triticale | 803.55 | 23 | 406.88 | A | 0.74 | 5.95E+02 | 406.9 | 6.35E-02 |
| Glyphosate, isopropylamine salt | Tropical/subtropical fruit | 5.12 | 2 | 6 | A | 0.74 | 3.79E+00 | 6.0 | 3.16E-01 |
| Glyphosate, isopropylamine salt | Turf/sod | 2817.98 | 82 | 1523.71 | A | 0.74 | 2.09E+03 | 1,523.7 | 1.67E-02 |
| Glyphosate, isopropylamine salt | Turf/sod | 8.72 | N/A | 280000 | S | 0.74 | 6.45E+00 | 6.428E+00 | - |
| Glyphosate, isopropylamine salt | Uncultivated ag | 263320.94 | 4957 | 122772.2 | A | 0.74 | 1.95E+05 | 122,772.2 | 3.20E-04 |
| Glyphosate, isopropylamine salt | Uncultivated ag | 19.33 | 28 | 136969.8 | S | 0.74 | 1.43E+01 | 3.144E+00 | 1.62E-01 |
| Glyphosate, isopropylamine salt | Uncultivated ag | 33.24 | 1 | 0.07 | U | 0.74 | 2.46E+01 | Not possible | - |
| Glyphosate, isopropylamine salt | Uncultivated non-ag | 11627.29 | 301 | 52641.34 | A | 0.74 | 8.60E+03 | 52,641.3 | 5.43E-04 |
| Glyphosate, isopropylamine salt | Uncultivated non-ag | 0.88 | N/A | 26374 | S | 0.74 | 6.51E-01 | 6.055E-01 | - |
| Glyphosate, isopropylamine salt | Uncultivated non-ag | 24.14 | N/A | 0.03 | U | 0.74 | 1.79E+01 | Not possible | - |
| Glyphosate, isopropylamine salt | Unknown | 643.4 | 15 | 477.41 | A | 0.74 | 4.76E+02 | 477.4 | 6.65E-02 |
| Glyphosate, isopropylamine salt | Vegetable | 7.31 | 5 | 12 | A | 0.74 | 5.41E+00 | 12.0 | 9.02E-02 |
| Glyphosate, isopropylamine salt | Vegetables, fruiting | 1.5 | 1 | 1.5 | A | 0.74 | 1.11E+00 | 1.5 | 7.40E-01 |
| Glyphosate, isopropylamine salt | Vertebrate control | 1.6 | 1 | 2 | A | 0.74 | 1.18E+00 | 2.0 | 5.92E-01 |
| Glyphosate, isopropylamine salt | Vertebrate control | 1.17 | N/A | N/A | N/A | 0.74 | 8.66E-01 | Not possible | - |
| Glyphosate, isopropylamine salt | Walnut | 286403.98 | 5913 | 165075.21 | A | 0.74 | 2.12E+05 | 165,075.2 | 2.17E-04 |
| Glyphosate, isopropylamine salt | Walnut | 0.31 | 3 | 12000 | S | 0.74 | 2.29E-01 | 2.755E-01 | 2.78E-01 |
| Glyphosate, isopropylamine salt | Water (industrial) | 183.61 | 2 | 115.46 | A | 0.74 | 1.36E+02 | 115.5 | 5.88E-01 |
| Glyphosate, isopropylamine salt | Water area | 19195.02 | 65 | 2653.53 | A | 0.74 | 1.42E+04 | 2,653.5 | 8.24E-02 |
| Glyphosate, isopropylamine salt | Water area | 46.56 | 2 | 1231821 | S | 0.74 | 3.45E+01 | 2.828E+01 | 6.09E-01 |
| Glyphosate, isopropylamine salt | Water area | 81.98 | N/A | 88 | U | 0.74 | 6.07E+01 | Not possible | - |
| Glyphosate, isopropylamine salt | Watercress | 2 | 2 | 3 | A | 0.74 | 1.48E+00 | 3.0 | 2.47E-01 |
| Glyphosate, isopropylamine salt | Watermelon | 11065.96 | 47 | 3772.7 | A | 0.74 | 8.19E+03 | 3,772.7 | 4.62E-02 |
| Glyphosate, isopropylamine salt | Wheat | 3489.2 | 44 | 2257.4 | A | 0.74 | 2.58E+03 | 2,257.4 | 2.60E-02 |
| Glyphosate, isopropylamine salt | Wheat (forage - fodder) | 1183.29 | 10 | 804 | A | 0.74 | 8.76E+02 | 804.0 | 1.09E-01 |
| Glyphosate, monoammonium salt | Almond | 11.15 | 2 | 16.5 | A | 0.94 | 1.05E+01 | 16.5 | 3.18E-01 |
| Glyphosate, monoammonium salt | Golf course turf | 145.68 | N/A | 24 | A | 0.94 | 1.37E+02 | 24.0 | - |
| Glyphosate, monoammonium salt | Landscape maintenance | 13294.81 | N/A | N/A | N/A | 0.94 | 1.25E+04 | Not possible | - |
| Glyphosate, monoammonium salt | Lemon | 0.93 | 2 | 16.9 | A | 0.94 | 8.74E-01 | 16.9 | 2.59E-02 |
| Glyphosate, monoammonium salt | N-grnhs flower | 5.36 | N/A | 3 | A | 0.94 | 5.04E+00 | 3.0 | - |
| Glyphosate, monoammonium salt | N-outdr plants in containers | 0.55 | 1 | 1500 | S | 0.94 | 5.17E-01 | 3.444E-02 | 1.50E+01 |
| Glyphosate, monoammonium salt | N-outdr transplants | 5.86 | 1 | 4 | A | 0.94 | 5.51E+00 | 4.0 | 1.38E+00 |
| Glyphosate, monoammonium salt | Public health | 6.96 | N/A | N/A | N/A | 0.94 | 6.54E+00 | Not possible | - |
| Glyphosate, monoammonium salt | Research commodity | 0.39 | N/A | N/A | N/A | 0.94 | 3.67E-01 | Not possible | - |
| Glyphosate, monoammonium salt | Rights of way | 2894.86 | N/A | N/A | N/A | 0.94 | 2.72E+03 | Not possible | - |
| Glyphosate, monoammonium salt | Structural pest control | 26.39 | N/A | N/A | N/A | 0.94 | 2.48E+01 | Not possible | - |
| Glyphosate, monoammonium salt | Uncultivated non-ag | 34.02 | N/A | 61 | A | 0.94 | 3.20E+01 | 61.0 | - |
| Glyphosate, monoammonium salt | Walnut | 4.88 | 2 | 11 | A | 0.94 | 4.59E+00 | 11.0 | 2.09E-01 |
| Glyphosate, potassium salt | Airport | 114.47 | N/A | 32 | A | 0.81 | 9.27E+01 | 32.0 | - |
| Glyphosate, potassium salt | Alfalfa | 216941.42 | 2941 | 138613.7 | A | 0.81 | 1.76E+05 | 138,613.7 | 4.31E-04 |
| Glyphosate, potassium salt | Almond | 1484346.9 | 17853 | 746003.08 | A | 0.81 | 1.20E+06 | 746,003.1 | 9.03E-05 |
| Glyphosate, potassium salt | Animal premise | 193.09 | N/A | 8 | U | 0.81 | 1.56E+02 | Not possible | - |
| Glyphosate, potassium salt | Apple | 1245.32 | 54 | 790.35 | A | 0.81 | 1.01E+03 | 790.4 | 2.36E-02 |
| Glyphosate, potassium salt | Apricot | 1031.07 | 58 | 516.63 | A | 0.81 | 8.35E+02 | 516.6 | 2.79E-02 |
| Glyphosate, potassium salt | Arugula | 8.84 | 1 | 8 | A | 0.81 | 7.16E+00 | 8.0 | 8.95E-01 |
| Glyphosate, potassium salt | Asparagus | 1561.15 | 10 | 581.7 | A | 0.81 | 1.26E+03 | 581.7 | 2.17E-01 |
| Glyphosate, potassium salt | Avocado | 35608.26 | 3066 | 24935.76 | A | 0.81 | 2.88E+04 | 24,935.8 | 3.77E-04 |
| Glyphosate, potassium salt | Barley | 22.07 | 1 | 16.5 | A | 0.81 | 1.79E+01 | 16.5 | 1.08E+00 |
| Glyphosate, potassium salt | Barley (forage - fodder) | 43.47 | 1 | 45.9 | A | 0.81 | 3.52E+01 | 45.9 | 7.67E-01 |
| Glyphosate, potassium salt | Bean, dried | 1019.21 | 9 | 383.4 | A | 0.81 | 8.26E+02 | 383.4 | 2.39E-01 |
| Glyphosate, potassium salt | Bean, succulent | 81.72 | 9 | 54 | A | 0.81 | 6.62E+01 | 54.0 | 1.36E-01 |
| Glyphosate, potassium salt | Bermudagrass | 7404.07 | 39 | 2226 | A | 0.81 | 6.00E+03 | 2,226.0 | 6.91E-02 |
| Glyphosate, potassium salt | Beverage crop | 0.66 | 3 | 4.2 | A | 0.81 | 5.35E-01 | 4.2 | 4.24E-02 |
| Glyphosate, potassium salt | Blackberry | 25.48 | 5 | 17.36 | A | 0.81 | 2.06E+01 | 17.4 | 2.38E-01 |
| Glyphosate, potassium salt | Blueberry | 797.65 | 21 | 300.37 | A | 0.81 | 6.46E+02 | 300.4 | 1.02E-01 |
| Glyphosate, potassium salt | Bok choy (choy sum, pak choi) | 0.26 | 3 | 3 | A | 0.81 | 2.11E-01 | 3.0 | 2.34E-02 |
| Glyphosate, potassium salt | Broccoli | 226.3 | 8 | 72.3 | A | 0.81 | 1.83E+02 | 72.3 | 3.17E-01 |
| Glyphosate, potassium salt | Bushberry | 5.52 | 1 | 4.75 | A | 0.81 | 4.47E+00 | 4.8 | 9.41E-01 |
| Glyphosate, potassium salt | Cabbage | 131.29 | 8 | 51.1 | A | 0.81 | 1.06E+02 | 51.1 | 2.60E-01 |
| Glyphosate, potassium salt | Cantaloupe | 698.72 | 11 | 287 | A | 0.81 | 5.66E+02 | 287.0 | 1.79E-01 |
| Glyphosate, potassium salt | Carrot | 175.76 | 3 | 101.8 | A | 0.81 | 1.42E+02 | 101.8 | 4.66E-01 |
| Glyphosate, potassium salt | Celery | 3.48 | 1 | 5 | A | 0.81 | 2.82E+00 | 5.0 | 5.64E-01 |
| Glyphosate, potassium salt | Cherimoya | 133.44 | 15 | 72.88 | A | 0.81 | 1.08E+02 | 72.9 | 9.89E-02 |
| Glyphosate, potassium salt | Cherry | 20364.87 | 724 | 9018.16 | A | 0.81 | 1.65E+04 | 9,018.2 | 2.53E-03 |
| Glyphosate, potassium salt | Chestnut | 37.19 | 3 | 18.66 | A | 0.81 | 3.01E+01 | 18.7 | 5.38E-01 |
| Glyphosate, potassium salt | Chinese cabbage (napa, wong bok, celery cabbage) | 25.1 | 2 | 11.6 | A | 0.81 | 2.03E+01 | 11.6 | 8.76E-01 |
| Glyphosate, potassium salt | Citrus | 116.38 | 10 | 275.22 | A | 0.81 | 9.43E+01 | 275.2 | 3.43E-02 |
| Glyphosate, potassium salt | Clover | 37.24 | 1 | 18 | A | 0.81 | 3.02E+01 | 18.0 | 1.68E+00 |
| Glyphosate, potassium salt | Commodity fumigation | 2.76 | N/A | N/A | N/A | 0.81 | 2.24E+00 | Not possible | - |
| Glyphosate, potassium salt | Corn (forage - fodder) | 260051.68 | 3428 | 172857.9 | A | 0.81 | 2.11E+05 | 172,857.9 | 3.55E-04 |
| Glyphosate, potassium salt | Corn, grain | 14495.83 | 246 | 9670.68 | A | 0.81 | 1.17E+04 | 9,670.7 | 4.94E-03 |
| Glyphosate, potassium salt | Corn, human consumption | 4061.44 | 30 | 1480.5 | A | 0.81 | 3.29E+03 | 1,480.5 | 7.41E-02 |
| Glyphosate, potassium salt | Cotton | 230539.5 | 2212 | 157845.02 | A | 0.81 | 1.87E+05 | 157,845.0 | 5.35E-04 |
| Glyphosate, potassium salt | County ag comm | 167.1 | N/A | N/A | N/A | 0.81 | 1.35E+02 | Not possible | - |
| Glyphosate, potassium salt | Cucumber | 2224.07 | 13 | 790.38 | A | 0.81 | 1.80E+03 | 790.4 | 1.75E-01 |
| Glyphosate, potassium salt | Daikon | 26.89 | 4 | 16 | A | 0.81 | 2.18E+01 | 16.0 | 3.40E-01 |
| Glyphosate, potassium salt | Date | 563.36 | 23 | 721 | A | 0.81 | 4.56E+02 | 721.0 | 2.75E-02 |
| Glyphosate, potassium salt | Ditch bank | 920.11 | 51 | 535.26 | A | 0.81 | 7.45E+02 | 535.3 | 2.73E-02 |
| Glyphosate, potassium salt | Eggplant | 4.83 | 4 | 3.5 | A | 0.81 | 3.91E+00 | 3.5 | 2.79E-01 |
| Glyphosate, potassium salt | Endive (escarole) | 81.26 | 4 | 40.1 | A | 0.81 | 6.58E+01 | 40.1 | 4.10E-01 |
| Glyphosate, potassium salt | Farm/ag building | 355.83 | 26 | 27.7 | A | 0.81 | 2.88E+02 | 27.7 | 4.00E-01 |
| Glyphosate, potassium salt | Fennel | 18.39 | 1 | 22 | A | 0.81 | 1.49E+01 | 22.0 | 6.77E-01 |
| Glyphosate, potassium salt | Fig | 7187.14 | 87 | 3155.6 | A | 0.81 | 5.82E+03 | 3,155.6 | 2.12E-02 |
| Glyphosate, potassium salt | Forage hay/silage | 844.08 | 8 | 400 | A | 0.81 | 6.84E+02 | 400.0 | 2.14E-01 |
| Glyphosate, potassium salt | Forest, timberland | 33.1 | 3 | 30.9 | A | 0.81 | 2.68E+01 | 30.9 | 2.89E-01 |
| Glyphosate, potassium salt | Garbanzo bean | 22.51 | 2 | 12 | A | 0.81 | 1.82E+01 | 12.0 | 7.60E-01 |
| Glyphosate, potassium salt | Garlic | 16810.36 | 54 | 7146.2 | A | 0.81 | 1.36E+04 | 7,146.2 | 3.53E-02 |
| Glyphosate, potassium salt | Golf course turf | 31.2 | N/A | 15.4 | A | 0.81 | 2.53E+01 | 15.4 | - |
| Glyphosate, potassium salt | Golf course turf | 7.88 | N/A | 11000 | S | 0.81 | 6.38E+00 | 2.525E-01 | - |
| Glyphosate, potassium salt | Grain | 67.69 | 1 | 35 | A | 0.81 | 5.48E+01 | 35.0 | 1.57E+00 |
| Glyphosate, potassium salt | Grape | 71962.36 | 1697 | 38698.35 | A | 0.81 | 5.83E+04 | 38,698.4 | 8.88E-04 |
| Glyphosate, potassium salt | Grape, wine | 249922.98 | 6676 | 144184.25 | A | 0.81 | 2.02E+05 | 144,184.3 | 2.10E-04 |
| Glyphosate, potassium salt | Grapefruit | 4671.3 | 240 | 3556.8 | A | 0.81 | 3.78E+03 | 3,556.8 | 4.43E-03 |
| Glyphosate, potassium salt | Grass, seed | 46.81 | 14 | 12.5 | A | 0.81 | 3.79E+01 | 12.5 | 2.17E-01 |
| Glyphosate, potassium salt | Guava | 383.15 | 34 | 189.7 | A | 0.81 | 3.10E+02 | 189.7 | 4.81E-02 |
| Glyphosate, potassium salt | Herb, spice | 68.3 | 1 | 36 | A | 0.81 | 5.53E+01 | 36.0 | 1.54E+00 |
| Glyphosate, potassium salt | Hops | 12.91 | 3 | 4.67 | A | 0.81 | 1.05E+01 | 4.7 | 7.46E-01 |
| Glyphosate, potassium salt | Jicama | 0.69 | 2 | 34 | A | 0.81 | 5.59E-01 | 34.0 | 8.22E-03 |
| Glyphosate, potassium salt | Kale | 150.33 | 3 | 50 | A | 0.81 | 1.22E+02 | 50.0 | 8.12E-01 |
| Glyphosate, potassium salt | Kiwi fruit fuzzy | 11439.87 | 480 | 4353.8 | A | 0.81 | 9.27E+03 | 4,353.8 | 4.43E-03 |
| Glyphosate, potassium salt | Kiwi fruit hardy | 13.79 | 1 | 4 | A | 0.81 | 1.12E+01 | 4.0 | 2.79E+00 |
| Glyphosate, potassium salt | Kohlrabi | 5.52 | 1 | 3 | A | 0.81 | 4.47E+00 | 3.0 | 1.49E+00 |
| Glyphosate, potassium salt | Kumquat | 15.17 | 2 | 6 | A | 0.81 | 1.23E+01 | 6.0 | 1.02E+00 |
| Glyphosate, potassium salt | Landscape maintenance | 747.73 | 162 | 437.17 | A | 0.81 | 6.06E+02 | 437.2 | 8.55E-03 |
| Glyphosate, potassium salt | Landscape maintenance | 11.53 | 8 | 50000 | S | 0.81 | 9.34E+00 | 1.148E+00 | 1.02E+00 |
| Glyphosate, potassium salt | Landscape maintenance | 115901.81 | N/A | N/A | N/A | 0.81 | 9.39E+04 | Not possible | - |
| Glyphosate, potassium salt | Lemon | 65333.19 | 2271 | 45226.16 | A | 0.81 | 5.29E+04 | 45,226.2 | 5.15E-04 |
| Glyphosate, potassium salt | Lettuce, head | 2760.24 | 42 | 892.3 | A | 0.81 | 2.24E+03 | 892.3 | 5.97E-02 |
| Glyphosate, potassium salt | Lettuce, leaf | 2436.01 | 36 | 982.91 | A | 0.81 | 1.97E+03 | 982.9 | 5.58E-02 |
| Glyphosate, potassium salt | Lime | 429.78 | 46 | 326.77 | A | 0.81 | 3.48E+02 | 326.8 | 2.32E-02 |
| Glyphosate, potassium salt | Melon | 1166.57 | 18 | 706.46 | A | 0.81 | 9.45E+02 | 706.5 | 7.43E-02 |
| Glyphosate, potassium salt | Mint | 176.54 | 1 | 73 | A | 0.81 | 1.43E+02 | 73.0 | 1.96E+00 |
| Glyphosate, potassium salt | Mushroom | 11.03 | 1 | 8 | A | 0.81 | 8.93E+00 | 8.0 | 1.12E+00 |
| Glyphosate, potassium salt | Mustard greens | 1.1 | 1 | 0.4 | A | 0.81 | 8.91E-01 | 0.4 | 2.23E+00 |
| Glyphosate, potassium salt | N-grnhs flower | 63.78 | 9 | 11.25 | A | 0.81 | 5.17E+01 | 11.3 | 5.10E-01 |
| Glyphosate, potassium salt | N-grnhs flower | 73.32 | 8 | 325075 | S | 0.81 | 5.94E+01 | 7.463E+00 | 9.95E-01 |
| Glyphosate, potassium salt | N-grnhs plants in containers | 131.15 | 17 | 58.15 | A | 0.81 | 1.06E+02 | 58.2 | 1.07E-01 |
| Glyphosate, potassium salt | N-grnhs plants in containers | 10.65 | 11 | 205618 | S | 0.81 | 8.63E+00 | 4.720E+00 | 1.66E-01 |
| Glyphosate, potassium salt | N-grnhs transplants | 1.89 | 1 | 2.5 | A | 0.81 | 1.53E+00 | 2.5 | 6.12E-01 |
| Glyphosate, potassium salt | N-grnhs transplants | 22.07 | N/A | 999999 | U | 0.81 | 1.79E+01 | Not possible | - |
| Glyphosate, potassium salt | N-outdr flower | 575.48 | 106 | 483.15 | A | 0.81 | 4.66E+02 | 483.2 | 9.10E-03 |
| Glyphosate, potassium salt | N-outdr flower | 3.1 | N/A | 9000 | S | 0.81 | 2.51E+00 | 2.066E-01 | - |
| Glyphosate, potassium salt | N-outdr plants in containers | 3952.69 | 850 | 2548.23 | A | 0.81 | 3.20E+03 | 2,548.2 | 1.48E-03 |
| Glyphosate, potassium salt | N-outdr plants in containers | 217.11 | 224 | 2550036 | S | 0.81 | 1.76E+02 | 5.854E+01 | 1.34E-02 |
| Glyphosate, potassium salt | N-outdr plants in containers | 120.23 | 34 | 10146 | U | 0.81 | 9.74E+01 | Not possible | - |
| Glyphosate, potassium salt | N-outdr transplants | 400.9 | 18 | 215.25 | A | 0.81 | 3.25E+02 | 215.3 | 8.38E-02 |
| Glyphosate, potassium salt | Nectarine | 14133.61 | 630 | 7195.54 | A | 0.81 | 1.14E+04 | 7,195.5 | 2.53E-03 |
| Glyphosate, potassium salt | Nuts | 3.79 | 2 | 3 | A | 0.81 | 3.07E+00 | 3.0 | 5.12E-01 |
| Glyphosate, potassium salt | Oat | 899.64 | 12 | 845.2 | A | 0.81 | 7.29E+02 | 845.2 | 7.18E-02 |
| Glyphosate, potassium salt | Oat (forage - fodder) | 164.59 | 5 | 103 | A | 0.81 | 1.33E+02 | 103.0 | 2.59E-01 |
| Glyphosate, potassium salt | Olive | 9938.58 | 263 | 5388.77 | A | 0.81 | 8.05E+03 | 5,388.8 | 5.68E-03 |
| Glyphosate, potassium salt | Onion, dry | 9352.44 | 72 | 5587.01 | A | 0.81 | 7.58E+03 | 5,587.0 | 1.88E-02 |
| Glyphosate, potassium salt | Onion, green | 8.84 | 1 | 8 | A | 0.81 | 7.16E+00 | 8.0 | 8.95E-01 |
| Glyphosate, potassium salt | Orange | 89621.02 | 3144 | 67809.82 | A | 0.81 | 7.26E+04 | 67,809.8 | 3.41E-04 |
| Glyphosate, potassium salt | Orchard floor | 312.99 | 21 | 230.92 | A | 0.81 | 2.54E+02 | 230.9 | 5.23E-02 |
| Glyphosate, potassium salt | Orchardgrass | 3.45 | 1 | 2 | A | 0.81 | 2.79E+00 | 2.0 | 1.40E+00 |
| Glyphosate, potassium salt | Parsley | 940.6 | 3 | 341 | A | 0.81 | 7.62E+02 | 341.0 | 7.45E-01 |
| Glyphosate, potassium salt | Pasture (forage - fodder) | 2.76 | 1 | 1 | A | 0.81 | 2.24E+00 | 1.0 | 2.24E+00 |
| Glyphosate, potassium salt | Pastureland | 1100.58 | 52 | 619.67 | A | 0.81 | 8.91E+02 | 619.7 | 2.77E-02 |
| Glyphosate, potassium salt | Peach | 30463.42 | 1424 | 15469.3 | A | 0.81 | 2.47E+04 | 15,469.3 | 1.12E-03 |
| Glyphosate, potassium salt | Pear | 826.21 | 26 | 585.82 | A | 0.81 | 6.69E+02 | 585.8 | 4.39E-02 |
| Glyphosate, potassium salt | Pear, asian (oriental pear, ya, ya li, nashi) | 119.65 | 7 | 88.5 | A | 0.81 | 9.69E+01 | 88.5 | 1.56E-01 |
| Glyphosate, potassium salt | Peas | 13.68 | 1 | 3.3 | A | 0.81 | 1.11E+01 | 3.3 | 3.36E+00 |
| Glyphosate, potassium salt | Pecan | 4467.31 | 92 | 1856.51 | A | 0.81 | 3.62E+03 | 1,856.5 | 2.12E-02 |
| Glyphosate, potassium salt | Pepper, fruiting | 779.96 | 7 | 374 | A | 0.81 | 6.32E+02 | 374.0 | 2.41E-01 |
| Glyphosate, potassium salt | Persimmon | 1660.8 | 123 | 939.4 | A | 0.81 | 1.35E+03 | 939.4 | 1.16E-02 |
| Glyphosate, potassium salt | Pistachio | 466202.15 | 5108 | 226508.71 | A | 0.81 | 3.78E+05 | 226,508.7 | 3.26E-04 |
| Glyphosate, potassium salt | Pistachio | 5.17 | 7 | 39844 | S | 0.81 | 4.19E+00 | 9.147E-01 | 6.54E-01 |
| Glyphosate, potassium salt | Pistachio | 11.8 | 11 | 130 | U | 0.81 | 9.56E+00 | Not possible | - |
| Glyphosate, potassium salt | Plum | 6204.24 | 372 | 3122.99 | A | 0.81 | 5.03E+03 | 3,123.0 | 4.33E-03 |
| Glyphosate, potassium salt | Pluot | 14.62 | 2 | 9.2 | A | 0.81 | 1.18E+01 | 9.2 | 6.44E-01 |
| Glyphosate, potassium salt | Pomegranate | 18596.96 | 171 | 9491.42 | A | 0.81 | 1.51E+04 | 9,491.4 | 9.28E-03 |
| Glyphosate, potassium salt | Pomelo | 703.44 | 34 | 487.5 | A | 0.81 | 5.70E+02 | 487.5 | 3.44E-02 |
| Glyphosate, potassium salt | Potato | 410.64 | 7 | 274.5 | A | 0.81 | 3.33E+02 | 274.5 | 1.73E-01 |
| Glyphosate, potassium salt | Prune | 30624.2 | 486 | 14947.87 | A | 0.81 | 2.48E+04 | 14,947.9 | 3.41E-03 |
| Glyphosate, potassium salt | Public health | 3.62 | N/A | N/A | N/A | 0.81 | 2.93E+00 | Not possible | - |
| Glyphosate, potassium salt | Pumpkin | <0.01 | 1 | 1 | A | 0.81 | #VALUE! | 1.0 | - |
| Glyphosate, potassium salt | Quince | 8.28 | 1 | 4 | A | 0.81 | 6.71E+00 | 4.0 | 1.68E+00 |
| Glyphosate, potassium salt | Radicchio | 410.57 | 6 | 323 | A | 0.81 | 3.33E+02 | 323.0 | 1.72E-01 |
| Glyphosate, potassium salt | Radish | 77.36 | 24 | 24.54 | A | 0.81 | 6.27E+01 | 24.5 | 1.06E-01 |
| Glyphosate, potassium salt | Rangeland | 1389.28 | 33 | 1118.5 | A | 0.81 | 1.13E+03 | 1,118.5 | 3.05E-02 |
| Glyphosate, potassium salt | Rape (leafy vegetable) | 8.84 | 1 | 8 | A | 0.81 | 7.16E+00 | 8.0 | 8.95E-01 |
| Glyphosate, potassium salt | Raspberry | 200.12 | 5 | 91.14 | A | 0.81 | 1.62E+02 | 91.1 | 3.56E-01 |
| Glyphosate, potassium salt | Regulatory pest control | 0.09 | 1 | 0.01 | U | 0.81 | 7.29E-02 | Not possible | - |
| Glyphosate, potassium salt | Regulatory pest control | 94.15 | N/A | N/A | N/A | 0.81 | 7.63E+01 | Not possible | - |
| Glyphosate, potassium salt | Research commodity | 774.07 | 154 | 346.93 | A | 0.81 | 6.27E+02 | 346.9 | 1.17E-02 |
| Glyphosate, potassium salt | Research commodity | 0.68 | 4 | 15100 | S | 0.81 | 5.51E-01 | 3.466E-01 | 3.97E-01 |
| Glyphosate, potassium salt | Research commodity | 223.5 | N/A | N/A | N/A | 0.81 | 1.81E+02 | Not possible | - |
| Glyphosate, potassium salt | Rice | 2057.06 | 29 | 1217.8 | A | 0.81 | 1.67E+03 | 1,217.8 | 4.72E-02 |
| Glyphosate, potassium salt | Rights of way | 31187.07 | 311 | 17424.21 | A | 0.81 | 2.53E+04 | 17,424.2 | 4.66E-03 |
| Glyphosate, potassium salt | Rights of way | 545.03 | 32 | 1945200 | S | 0.81 | 4.41E+02 | 4.466E+01 | 3.09E-01 |
| Glyphosate, potassium salt | Rights of way | 68.27 | 6 | 0.06 | U | 0.81 | 5.53E+01 | Not possible | - |
| Glyphosate, potassium salt | Rights of way | 158950.77 | N/A | N/A | N/A | 0.81 | 1.29E+05 | Not possible | - |
| Glyphosate, potassium salt | Rye | 583.39 | 8 | 337.5 | A | 0.81 | 4.73E+02 | 337.5 | 1.75E-01 |
| Glyphosate, potassium salt | Ryegrass | 444.81 | 7 | 212.5 | A | 0.81 | 3.60E+02 | 212.5 | 2.42E-01 |
| Glyphosate, potassium salt | Safflower | 6461.39 | 62 | 10873.5 | A | 0.81 | 5.23E+03 | 10,873.5 | 7.76E-03 |
| Glyphosate, potassium salt | Sod farm (turf) | 61.81 | 1 | 28 | A | 0.81 | 5.01E+01 | 28.0 | 1.79E+00 |
| Glyphosate, potassium salt | Soil fumigation/preplant | 8301.22 | 43 | 4837.12 | A | 0.81 | 6.72E+03 | 4,837.1 | 3.23E-02 |
| Glyphosate, potassium salt | Sorghum (forage - fodder) | 548.89 | 7 | 363.75 | A | 0.81 | 4.45E+02 | 363.8 | 1.75E-01 |
| Glyphosate, potassium salt | Sorghum/milo | 1683.68 | 16 | 857.81 | A | 0.81 | 1.36E+03 | 857.8 | 9.94E-02 |
| Glyphosate, potassium salt | Spinach | 11.03 | 1 | 2 | A | 0.81 | 8.93E+00 | 2.0 | 4.47E+00 |
| Glyphosate, potassium salt | Squash | 384.13 | 6 | 115 | A | 0.81 | 3.11E+02 | 115.0 | 4.51E-01 |
| Glyphosate, potassium salt | Squash, winter | 70.12 | 1 | 15.4 | A | 0.81 | 5.68E+01 | 15.4 | 3.69E+00 |
| Glyphosate, potassium salt | Stone fruit | 47.69 | 8 | 43.3 | A | 0.81 | 3.86E+01 | 43.3 | 1.12E-01 |
| Glyphosate, potassium salt | Strawberry | 1936.15 | 36 | 608.12 | A | 0.81 | 1.57E+03 | 608.1 | 7.16E-02 |
| Glyphosate, potassium salt | Structural pest control | 57.93 | 3 | 16.5 | A | 0.81 | 4.69E+01 | 16.5 | 9.48E-01 |
| Glyphosate, potassium salt | Structural pest control | 147.13 | N/A | N/A | N/A | 0.81 | 1.19E+02 | Not possible | - |
| Glyphosate, potassium salt | Sudangrass | 114.14 | 2 | 60.2 | A | 0.81 | 9.25E+01 | 60.2 | 7.68E-01 |
| Glyphosate, potassium salt | Sugarbeet | 34950.76 | 312 | 23859.59 | A | 0.81 | 2.83E+04 | 23,859.6 | 3.80E-03 |
| Glyphosate, potassium salt | Sugarbeet (forage - fodder) | 389.59 | 5 | 282.4 | A | 0.81 | 3.16E+02 | 282.4 | 2.23E-01 |
| Glyphosate, potassium salt | Sunflower | 1525.66 | 22 | 688.2 | A | 0.81 | 1.24E+03 | 688.2 | 8.16E-02 |
| Glyphosate, potassium salt | Sweet potato | 1066.98 | 21 | 529.5 | A | 0.81 | 8.64E+02 | 529.5 | 7.77E-02 |
| Glyphosate, potassium salt | Tangelo | 1451.58 | 53 | 1253.52 | A | 0.81 | 1.18E+03 | 1,253.5 | 1.77E-02 |
| Glyphosate, potassium salt | Tangerine | 86360.74 | 1911 | 47660.29 | A | 0.81 | 7.00E+04 | 47,660.3 | 7.68E-04 |
| Glyphosate, potassium salt | Tomato | 6155.57 | 52 | 2605.76 | A | 0.81 | 4.99E+03 | 2,605.8 | 3.68E-02 |
| Glyphosate, potassium salt | Tomato, processing | 46378.49 | 267 | 19041.54 | A | 0.81 | 3.76E+04 | 19,041.5 | 7.39E-03 |
| Glyphosate, potassium salt | Triticale | 768.9 | 21 | 687.89 | A | 0.81 | 6.23E+02 | 687.9 | 4.31E-02 |
| Glyphosate, potassium salt | Tropical/subtropical fruit | 156.08 | 17 | 69.34 | A | 0.81 | 1.26E+02 | 69.3 | 1.07E-01 |
| Glyphosate, potassium salt | Turf/sod | 214.73 | 4 | 78.04 | A | 0.81 | 1.74E+02 | 78.0 | 5.57E-01 |
| Glyphosate, potassium salt | Turf/sod | 1.03 | N/A | 6000 | S | 0.81 | 8.34E-01 | 1.377E-01 | - |
| Glyphosate, potassium salt | Uncultivated ag | 146089.94 | 2035 | 62437.84 | A | 0.81 | 1.18E+05 | 62,437.8 | 9.31E-04 |
| Glyphosate, potassium salt | Uncultivated ag | 2.59 | 2 | 14457 | S | 0.81 | 2.10E+00 | 3.319E-01 | 3.16E+00 |
| Glyphosate, potassium salt | Uncultivated non-ag | 10088.41 | 182 | 3288.19 | A | 0.81 | 8.17E+03 | 3,288.2 | 1.37E-02 |
| Glyphosate, potassium salt | Uncultivated non-ag | 9.83 | 4 | 146000 | S | 0.81 | 7.96E+00 | 3.352E+00 | 5.94E-01 |
| Glyphosate, potassium salt | Uncultivated non-ag | 2.11 | N/A | 6 | U | 0.81 | 1.71E+00 | Not possible | - |
| Glyphosate, potassium salt | Unknown | 236.36 | 5 | 115.57 | A | 0.81 | 1.91E+02 | 115.6 | 3.31E-01 |
| Glyphosate, potassium salt | Vegetable | 0.08 | 1 | 0.15 | A | 0.81 | 6.48E-02 | 0.2 | 4.32E-01 |
| Glyphosate, potassium salt | Vertebrate control | 8.27 | N/A | N/A | N/A | 0.81 | 6.70E+00 | Not possible | - |
| Glyphosate, potassium salt | Walnut | 303938.99 | 5040 | 144316.1 | A | 0.81 | 2.46E+05 | 144,316.1 | 3.38E-04 |
| Glyphosate, potassium salt | Water area | 521.55 | 4 | 391 | A | 0.81 | 4.22E+02 | 391.0 | 2.70E-01 |
| Glyphosate, potassium salt | Watermelon | 3126.59 | 24 | 1278.4 | A | 0.81 | 2.53E+03 | 1,278.4 | 8.25E-02 |
| Glyphosate, potassium salt | Wheat | 4760.28 | 40 | 2389.3 | A | 0.81 | 3.86E+03 | 2,389.3 | 4.03E-02 |
| Glyphosate, potassium salt | Wheat (forage - fodder) | 2650.39 | 27 | 1703.86 | A | 0.81 | 2.15E+03 | 1,703.9 | 4.67E-02 |
| Glyphosate-trimesium | Almond | 59.98 | 1 | 40 | A | 0.69 | 4.14E+01 | 40.0 | 1.03E+00 |

**Table S2** Number and percentage of entries for the various glyphosate forms noted in Table S1

| **Glyphosate form** | **Number of entries**  **(all data)** | **Percentage of entries**  **(all data)** | **Number of entries**  **(filtered data)** | **Percentage of entries**  **(filtered data)** |
| --- | --- | --- | --- | --- |
| Glyphosate | 1 | 0.23 | 1.00 | 0.28 |
| Glyphosate, diammonium salt | 18 | 4.19 | 15.00 | 4.24 |
| Glyphosate, dimethylamine salt | 14 | 3.26 | 9.00 | 2.54 |
| Glyphosate, isopropylamine salt | 208 | 48.37 | 170.00 | 48.02 |
| Glyphosate, monoammonium salt | 13 | 3.02 | 5.00 | 1.41 |
| Glyphosate, potassium salt | 175 | 40.70 | 153.00 | 43.22 |
| Glyphosate-trimesium | 1 | 0.23 | 1.00 | 0.28 |
| *Total* | *430* | *100* | *354* | *100* |

***Maximum glyphosate application rates that would not exceed the levels of concerns (LOCs)***

The maximum glyphosate application rates that would not exceed the acute and chronic LOCs were calculated using the most conservative assumptions and scenarios. The sections below provide the datasets and linear regressions used in these calculations.

- ***Honeybees***

The datasets for acute and chronic scenarios are provided in **Table S3**. The linear regressions are provided in **Figure S1**.

**Table S3** Acute and chronic RQs used to calculate the maximum glyphosate application rates that would not exceed the LOCs in honeybees

| **Application rate (lbs/A)** | **Acute RQ** | **Chronic RQ** |
| --- | --- | --- |
| 7.70E-05 | 2.48E-05 | 8.72E+00 |
| 1.42E-01 | 4.57E-02 | 1.61E+04 |
| 7.01E-01 | 2.25E-01 | 7.92E+04 |
| 2.23E+00 | 7.16E-01 | 2.52E+05 |
| 6.45E+01 | 2.07E+01 | 7.29E+06 |

|  | |
| --- | --- |
|  |  |

**Figure S1** Linear regressions for acute (A) and chronic (B) scenarios used to calculate the maximum glyphosate application rates that would not exceed the LOCs in honeybees

- ***Herpetofauna***

The datasets for acute and chronic scenarios are provided in **Table S4**. The linear regressions are provided in **Figure S2**.

**Table S4** Acute and chronic RQs used to calculate the maximum glyphosate application rates that would not exceed the LOCs in herpetofauna

| **Application rate (lbs/A)** | **Acute RQ** | **Chronic RQ** |
| --- | --- | --- |
| 7.70E-05 | 6.58E-06 | 3.69E-05 |
| 1.42E-01 | 1.21E-02 | 6.80E-02 |
| 7.01E-01 | 5.99E-02 | 3.36E-01 |
| 2.23E+00 | 1.91E-01 | 1.07E+00 |
| 6.45E+01 | 5.51E+00 | 3.09E+01 |

|  | |
| --- | --- |
|  |  |

**Figure S2** Linear regressions for acute (A) and chronic (B) scenarios used to calculate the maximum glyphosate application rates that would not exceed the LOCs in herpetofauna

- ***Birds***

The datasets for acute and chronic scenarios are provided in **Table S5**. The linear regressions are provided in **Figure S3**.

**Table S5** Acute and chronic RQs used to calculate the maximum glyphosate application rates that would not exceed the LOCs in birds

| **Application rate (lbs/A)** | **Acute RQ** | **Chronic RQ** |
| --- | --- | --- |
| 7.70E-05 | 1.46E-05 | 3.69E-05 |
| 1.42E-01 | 2.70E-02 | 6.81E-02 |
| 7.01E-01 | 1.33E-01 | 3.36E-01 |
| 2.23E+00 | 4.23E-01 | 1.07E+00 |
| 6.45E+01 | 1.22E+01 | 3.09E+01 |

|  | |
| --- | --- |
|  |  |

**Figure S3** Linear regressions for acute (A) and chronic (B) scenarios used to calculate the maximum glyphosate application rates that would not exceed the LOCs in birds

- ***Mammals***

The datasets for acute and chronic scenarios are provided in **Table S6**. The linear regressions are provided in **Figure S4**.

**Table S6** Acute and chronic RQs used to calculate the maximum glyphosate application rates that would not exceed the LOCs in mammals

| **Application rate (lbs/A)** | **Acute RQ** | **Chronic RQ** |
| --- | --- | --- |
| 7.70E-05 | 9.47E-06 | 2.68E-04 |
| 1.42E-01 | 1.74E-02 | 4.93E-01 |
| 7.01E-01 | 8.60E-02 | 2.43E+00 |
| 2.23E+00 | 2.74E-01 | 7.74E+00 |
| 6.45E+01 | 7.91E+00 | 2.24E+02 |

|  | |
| --- | --- |
|  |  |

**Figure S4** Linear regressions for acute (A) and chronic (B) scenarios used to calculate the maximum glyphosate application rates that would not exceed the LOCs in mammals
